# Supplementary material for: IKZF1 deletions associate with CRLF2 overexpression leading to a poor prognosis in B-cell precursor acute lymphoblastic leukaemia
Source: PubMed Central journal article supplement — Transl Oncol. 2021 Nov 23;15(1):101291. doi: 10.1016/j.tranon.2021.101291 (PMC8633010; doi:10.1016/j.tranon.2021.101291), 2021-11-23
Supplement: mmc2.pdf [file mmc2.pdf]

**TABLE S1** Characterisation of B-ALL patients according to *CRLF2* expression

|                                      | <i>CRLF2</i> -low<br>n (%) | <i>CRLF2</i> -high<br>n (%) | <i>p</i> value |
|--------------------------------------|----------------------------|-----------------------------|----------------|
| <b>Paediatric (&lt;18 years-old)</b> |                            |                             |                |
| Median age (range)                   | 6.2 (0.2-17)               | 6.1 (2-16)                  |                |
| <b>Adult (≥18 years-old)</b>         |                            |                             |                |
| Median age (range)                   | 31 (18-67)                 | 40.5 (18-82)                |                |
| <b>Sex</b>                           |                            |                             | 0.887          |
| Female                               | 36 (36.7)                  | 11 (33.3)                   |                |
| Male                                 | 62 (63.3)                  | 22 (66.7)                   |                |
| <b>WBC count (x10<sup>9</sup>/L)</b> |                            |                             | 0.846          |
| Median (range)                       | 16.5 (0.9-335.4)           | 16.7 (1.1-493.5)            |                |
| <50                                  | 72 (73.5)                  | 23 (69.7)                   |                |
| ≥50                                  | 26 (26.5)                  | 10 (30.3)                   |                |
| <b>CNS involvement</b>               |                            |                             | 0.503          |
| Yes                                  | 9 (9.6)                    | 4 (13.8)                    |                |
| No                                   | 85 (90.4)                  | 25 (86.2)                   |                |
| <b>Glucocorticoid response*</b>      |                            |                             | 0.333          |
| Good                                 | 47 (73.4)                  | 14 (87.5)                   |                |
| Poor                                 | 17 (26.6)                  | 2 (12.5)                    |                |
| <b>Total</b>                         | <b>98 (100)</b>            | <b>33 (100)</b>             |                |

CNS, Central Nervous System; WBC, white blood cell count;

Paediatric patients were treated with BFM (n=50), EsPhALL (n=2) or RELLA05 (n=32) protocols. Adult patients were treated with BFM (n=20), Hyper-CVAD (n=13), GMALL (n=2), CALB (n=1) or EWALL (n=1) protocols (n=20).

\*Prednisone or dexamethasone response, however 45 cases were excluded from this analysis due to treatment strategy (Hyper-CVAD and RELLA05); Good: <1,000 leukaemic blasts/μL on treatment day 7/ 8; Poor: ≥1,000 leukaemic blasts/μL on treatment day 7/ 8. Statistical significance was accessed with Fisher's exact test using the RStudio software version 1.2. *p* values<0.05 were interpreted as significant.

**TABLE S2** Overall survival analysis of paediatric B-ALL patients.

| RELLA05 cohort                                   |                     |                             |                       |                             | Paediatric cohort                    |                     |                             |                       |                             |
|--------------------------------------------------|---------------------|-----------------------------|-----------------------|-----------------------------|--------------------------------------|---------------------|-----------------------------|-----------------------|-----------------------------|
| Variable                                         | Univariate analysis |                             | Multivariate analysis |                             | Variable                             | Univariate analysis |                             | Multivariate analysis |                             |
|                                                  | OS (95% CI)*        | <i>p</i> value <sup>†</sup> | HR (95% CI)           | <i>p</i> value <sup>†</sup> |                                      | OS (95% CI)*        | <i>p</i> value <sup>†</sup> | HR (95% CI)           | <i>p</i> value <sup>†</sup> |
| <b><i>KMT2A</i>-rearranged</b>                   |                     | <b>0.064</b>                | 1.0 (0.0-128.5)       | 1.000                       | <b>Glucocorticoid response</b>       |                     | <b>0.015</b>                | 1.8 (0.8-4.3)         | 0.163                       |
| Negative                                         | 67.3 (60.9-73.6)    |                             |                       |                             | Poor                                 | 53.0 (41.1-64.9)    |                             |                       |                             |
| Positive                                         | 39.6 (0.0-84.5)     |                             |                       |                             | Good                                 | 68.2 (63.1-73.3)    |                             |                       |                             |
| <b><i>CRLF2</i> status</b>                       |                     | <b>0.067</b>                | 1.0 (0.0-352.4)       | 1.000                       | <b>WBC count (x10<sup>9</sup>/L)</b> |                     | <b>&lt;0.001</b>            | 2.7 (1.2-6.2)         | <b>0.017</b>                |
| Low                                              | 69.3 (64.1-74.5)    |                             |                       |                             | <50                                  | 67.7 (63.0-72.3)    |                             |                       |                             |
| High                                             | 54.9 (34.3-75.5)    |                             |                       |                             | ≥50                                  | 42.3 (25.6-59.0)    |                             |                       |                             |
| <b>Short isoform</b>                             |                     | <b>&lt;0.001</b>            | 1.0 (0.0-22391.3)     | 1.000                       | <b><i>BCR-ABL1</i></b>               |                     | <b>0.065</b>                | 0.8 (0.3-2.0)         | 0.619                       |
| Low load                                         | 6.7 (6.7-6.7)       |                             |                       |                             | Negative                             | 64.0 (58.1-69.9)    |                             |                       |                             |
| High load                                        | 69.0 (63.4-74.7)    |                             |                       |                             | Positive                             | 45.8 (36.4-55.3)    |                             |                       |                             |
| <b><i>CRLF2/IKZF1</i> status</b>                 |                     | <b>0.067</b>                | 1.0 (0.0-128.6)       | 1.000                       |                                      |                     |                             |                       |                             |
| <i>CRLF2</i> -low/ <i>IKZF1</i> wt               | 68.9 (63.0-74.8)    |                             |                       |                             |                                      |                     |                             |                       |                             |
| <i>CRLF2</i> -low/ <i>IKZF1</i> del <sup>‡</sup> | -                   |                             |                       |                             |                                      |                     |                             |                       |                             |
| <i>CRLF2</i> -high/ <i>IKZF1</i> wt              | 61.1 (41.7-80.6)    |                             |                       |                             |                                      |                     |                             |                       |                             |
| <i>CRLF2</i> -high/ <i>IKZF1</i> del             | 36.1 (0.0-85.9)     |                             |                       |                             |                                      |                     |                             |                       |                             |

CI, confidence interval. del, deleted, HR, hazard ratio; OS, overall survival, wt, wild-type.

\*Mean for survival time. †Log-rank test.

‡No statistics are computed for this group because all cases are censored.

**TABLE S3** Overall survival analysis of adult B-ALL patients.

| Variable                             | Univariate analysis |                             | Multivariate analysis |                             |
|--------------------------------------|---------------------|-----------------------------|-----------------------|-----------------------------|
|                                      | OS (95% CI)*        | <i>p</i> value <sup>†</sup> | HR (95% CI)           | <i>p</i> value <sup>†</sup> |
| <b><i>KMT2A</i>-rearranged</b>       |                     | <b>0.007</b>                | 61.3 (2.1-1778.8)     | <b>0.017</b>                |
| Negative                             | 38.1 (27.2-49.1)    |                             |                       |                             |
| Positive                             | 4.2 (0.0-8.5)       |                             |                       |                             |
| <b><i>CRLF2</i> status</b>           |                     | <b>0.072</b>                | 0.1 (0.0-5.0)         | 0.266                       |
| Low                                  | 40.8 (27.9-53.7)    |                             |                       |                             |
| High                                 | 26.5 (11.5-41.6)    |                             |                       |                             |
| <b><i>IKZF1</i> status</b>           |                     | <b>0.042</b>                | 34.6 (1.7-724.6)      | <b>0.022</b>                |
| Wild-type                            | 52.0 (35.7-68.4)    |                             |                       |                             |
| Deleted                              | 29.6 (16.4-42.7)    |                             |                       |                             |
| <b><i>IKZF1</i> plus</b>             |                     | <b>0.007</b>                | 1.2 (0.1-9.7)         | 0.858                       |
| Wild-type                            | 52.0 (35.7-68.4)    |                             |                       |                             |
| Non-plus                             | 8.9 (1.9-16.0)      |                             |                       |                             |
| Plus                                 | 30.5 (12.4-48.5)    |                             |                       |                             |
| <b><i>CRLF2/IKZF1</i> status</b>     |                     | <b>0.094</b>                | 0.7 (0.1-4.9)         | 0.724                       |
| <i>CRLF2</i> -low/ <i>IKZF1</i> wt   | 47.6 (32.4-62.7)    |                             |                       |                             |
| <i>CRLF2</i> -low/ <i>IKZF1</i> del  | 18.6 (9.9-27.3)     |                             |                       |                             |
| <i>CRLF2</i> -high/ <i>IKZF1</i> wt  | 9.7 (0.0-20.7)      |                             |                       |                             |
| <i>CRLF2</i> -high/ <i>IKZF1</i> del | 29.7 (11.8-47.5)    |                             |                       |                             |
| <b>Short isoform</b>                 |                     | <b>0.006</b>                | 0.9 (0.0-33.1)        | 0.960                       |
| Low load                             | 21.0 (9.0-33.1)     |                             |                       |                             |
| High load                            | 49.3 (35.6-63.1)    |                             |                       |                             |
| <b><i>CRLF2</i>/Short isoform</b>    |                     | <b>0.009</b>                | 68.1 (0.4-11176.7)    | 0.105                       |
| <i>CRLF2</i> -low/Low load           | 24.8 (9.1-40.5)     |                             |                       |                             |
| <i>CRLF2</i> -low/High load          | 50.6 (31.6-69.7)    |                             |                       |                             |
| <i>CRLF2</i> -high/Low load          | 8.6 (1.2-15.9)      |                             |                       |                             |
| <i>CRLF2</i> -high/High load         | 46.9 (26.8-67.1)    |                             |                       |                             |

CI, confidence interval. del, deleted, HR, hazard ratio; OS, overall survival, wt, wild-type.  
 \*Mean for survival time. †Log-rank test
